# Supplementary material for: bModelTest: Bayesian phylogenetic site model averaging and model comparison
Source: PubMed Central journal article supplement (PMC5294809; doi:10.1186/s12862-017-0890-6), 2017-02-06
Supplement: 12862_2017_890_MOESM1_ESM.pdf [file 12862_2017_890_MOESM1_ESM.pdf]

## Appendix

### list of all transition/transversion split models

| model number | $r_{ac}$ | $r_{ag}$ | $r_{at}$ | $r_{cg}$ | $r_{ct}$ | $r_{gt}$ | name     |
|--------------|----------|----------|----------|----------|----------|----------|----------|
| 0            | 1        | 1        | 1        | 1        | 1        | 1        | JC69/F81 |
| 1            | 1        | 2        | 1        | 1        | 2        | 1        | K80/HKY  |
| 2            | 1        | 2        | 1        | 1        | 2        | 3        |          |
| 3            | 1        | 2        | 1        | 1        | 3        | 1        | TN93     |
| 4            | 1        | 2        | 1        | 1        | 3        | 4        |          |
| 5            | 1        | 2        | 1        | 3        | 2        | 1        |          |
| 6            | 1        | 2        | 1        | 3        | 2        | 3        |          |
| 7            | 1        | 2        | 1        | 3        | 2        | 4        |          |
| 8            | 1        | 2        | 1        | 3        | 4        | 1        |          |
| 9            | 1        | 2        | 1        | 3        | 4        | 3        |          |
| 10           | 1        | 2        | 1        | 3        | 4        | 5        |          |
| 11           | 1        | 2        | 3        | 1        | 2        | 1        |          |
| 12           | 1        | 2        | 3        | 1        | 2        | 3        |          |
| 13           | 1        | 2        | 3        | 1        | 2        | 4        |          |
| 14           | 1        | 2        | 3        | 1        | 4        | 1        |          |
| 15           | 1        | 2        | 3        | 1        | 4        | 3        |          |
| 16           | 1        | 2        | 3        | 1        | 4        | 5        |          |
| 17           | 1        | 2        | 3        | 3        | 2        | 1        | K81      |
| 18           | 1        | 2        | 3        | 3        | 2        | 3        |          |
| 19           | 1        | 2        | 3        | 3        | 2        | 4        |          |
| 20           | 1        | 2        | 3        | 3        | 4        | 1        | TIM      |
| 21           | 1        | 2        | 3        | 3        | 4        | 3        |          |
| 22           | 1        | 2        | 3        | 3        | 4        | 5        |          |
| 23           | 1        | 2        | 3        | 4        | 2        | 1        |          |
| 24           | 1        | 2        | 3        | 4        | 2        | 3        |          |
| 25           | 1        | 2        | 3        | 4        | 2        | 4        |          |
| 26           | 1        | 2        | 3        | 4        | 2        | 5        | TVM      |
| 27           | 1        | 2        | 3        | 4        | 5        | 1        |          |
| 28           | 1        | 2        | 3        | 4        | 5        | 3        |          |
| 29           | 1        | 2        | 3        | 4        | 5        | 4        |          |
| 30           | 1        | 2        | 3        | 4        | 5        | 6        | GTR      |

List of all named models, and potential models to split into

JC69/F81 111111 : 121121

K80/HKY 121121 : 121131, 123321

TN93 121131 : 123341

K81 123321 : 123341,123324

TIM 123341 : 123345

123324 : 123345,123425

123345 : 123456

TVM 123425 : 123456

123345 : 123456

GTR 123456 :

**List of all transition/tranversionsplit models, and potential models to split into**

111111 : 121121  
121121 : 121123, 121131, 121321, 121323, 123121, 123123, 123321, 123323  
121123 : 121134, 121324, 123124, 123324  
121131 : 121134, 121341, 121343, 123141, 123143, 123341, 123343  
121134 : 121345, 123145, 123345  
121321 : 121324, 121341, 123421, 123423  
121323 : 121324, 121343, 123424  
121324 : 121345, 123425  
121341 : 121345, 123451, 123453  
121343 : 121345, 123454  
121345 : 123456  
123121 : 123124, 123141, 123421, 123424  
123123 : 123124, 123143, 123423  
123124 : 123145, 123425  
123141 : 123145, 123451, 123454  
123143 : 123145, 123453  
123145 : 123456  
123321 : 123324, 123341, 123421  
123323 : 123324, 123343, 123423, 123424  
123324 : 123345, 123425  
123341 : 123345, 123451  
123343 : 123345, 123453, 123454  
123345 : 123456  
123421 : 123425, 123451  
123423 : 123425, 123453  
123424 : 123425, 123454  
123425 : 123456  
123451 : 123456  
123453 : 123456  
123454 : 123456  
123456 :

**List of all reversible models, and potential models to split into**

111111 : 111112, 111121, 111122, 111211, 111212, 111221, 111222, 112111, 112112, 112121, 112122, 112211, 112212, 112221, 112222, 121111, 121112, 121121, 121122, 121211, 121212, 121221, 121222, 122111, 122112, 122121, 122122, 122211, 122212, 122221, 122222  
111112 : 111123, 111213, 111223, 112113, 112123, 112213, 112223, 121113, 121123, 121213, 121223, 122113, 122123, 122213, 122223  
111121 : 111123, 111231, 111232, 112131, 112132, 112231, 112232, 121131, 121132, 121231, 121232, 122131, 122132, 122231, 122232  
111122 : 111123, 111233, 112133, 112233, 121133, 121233, 122133, 122233  
111123 : 111234, 112134, 112234, 121134, 121234, 122134, 122234  
111211 : 111213, 111231, 111233, 112311, 112312, 112321, 112322, 121311, 121312,

121321, 121322, 122311, 122312, 122321, 122322  
111212 : 111213, 111232, 112313, 112323, 121313, 121323, 122313, 122323  
111213 : 111234, 112314, 112324, 121314, 121324, 122314, 122324  
111221 : 111223, 111231, 112331, 112332, 121331, 121332, 122331, 122332  
111222 : 111223, 111232, 111233, 112333, 121333, 122333  
111223 : 111234, 112334, 121334, 122334  
111231 : 111234, 112341, 112342, 121341, 121342, 122341, 122342  
111232 : 111234, 112343, 121343, 122343  
111233 : 111234, 112344, 121344, 122344  
111234 : 112345, 121345, 122345  
112111 : 112113, 112131, 112133, 112311, 112313, 112331, 112333, 123111, 123112,  
123121, 123122, 123211, 123212, 123221, 123222  
112112 : 112113, 112132, 112312, 112332, 123113, 123123, 123213, 123223  
112113 : 112134, 112314, 112334, 123114, 123124, 123214, 123224  
112121 : 112123, 112131, 112321, 112323, 123131, 123132, 123231, 123232  
112122 : 112123, 112132, 112133, 112322, 123133, 123233  
112123 : 112134, 112324, 123134, 123234  
112131 : 112134, 112341, 112343, 123141, 123142, 123241, 123242  
112132 : 112134, 112342, 123143, 123243  
112133 : 112134, 112344, 123144, 123244  
112134 : 112345, 123145, 123245  
112211 : 112213, 112231, 112233, 112311, 123311, 123312, 123321, 123322  
112212 : 112213, 112232, 112312, 112313, 123313, 123323  
112213 : 112234, 112314, 123314, 123324  
112221 : 112223, 112231, 112321, 112331, 123331, 123332  
112222 : 112223, 112232, 112233, 112322, 112323, 112332, 112333, 123333  
112223 : 112234, 112324, 112334, 123334  
112231 : 112234, 112341, 123341, 123342  
112232 : 112234, 112342, 112343, 123343  
112233 : 112234, 112344, 123344  
112234 : 112345, 123345  
112311 : 112314, 112341, 112344, 123411, 123412, 123421, 123422  
112312 : 112314, 112342, 123413, 123423  
112313 : 112314, 112343, 123414, 123424  
112314 : 112345, 123415, 123425  
112321 : 112324, 112341, 123431, 123432  
112322 : 112324, 112342, 112344, 123433  
112323 : 112324, 112343, 123434  
112324 : 112345, 123435  
112331 : 112334, 112341, 123441, 123442  
112332 : 112334, 112342, 123443  
112333 : 112334, 112343, 112344, 123444  
112334 : 112345, 123445  
112341 : 112345, 123451, 123452  
112342 : 112345, 123453  
112343 : 112345, 123454

112344 : 112345, 123455  
112345 : 123456  
121111 : 121113, 121131, 121133, 121311, 121313, 121331, 121333, 123111, 123113,  
123131, 123133, 123311, 123313, 123331, 123333  
121112 : 121113, 121132, 121312, 121332, 123112, 123132, 123312, 123332  
121113 : 121134, 121314, 121334, 123114, 123134, 123314, 123334  
121121 : 121123, 121131, 121321, 121323, 123121, 123123, 123321, 123323  
121122 : 121123, 121132, 121133, 121322, 123122, 123322  
121123 : 121134, 121324, 123124, 123324  
121131 : 121134, 121341, 121343, 123141, 123143, 123341, 123343  
121132 : 121134, 121342, 123142, 123342  
121133 : 121134, 121344, 123144, 123344  
121134 : 121345, 123145, 123345  
121211 : 121213, 121231, 121233, 121311, 123211, 123213, 123231, 123233  
121212 : 121213, 121232, 121312, 121313, 123212, 123232  
121213 : 121234, 121314, 123214, 123234  
121221 : 121223, 121231, 121321, 121331, 123221, 123223  
121222 : 121223, 121232, 121233, 121322, 121323, 121332, 121333, 123222  
121223 : 121234, 121324, 121334, 123224  
121231 : 121234, 121341, 123241, 123243  
121232 : 121234, 121342, 121343, 123242  
121233 : 121234, 121344, 123244  
121234 : 121345, 123245  
121311 : 121314, 121341, 121344, 123411, 123413, 123431, 123433  
121312 : 121314, 121342, 123412, 123432  
121313 : 121314, 121343, 123414, 123434  
121314 : 121345, 123415, 123435  
121321 : 121324, 121341, 123421, 123423  
121322 : 121324, 121342, 121344, 123422  
121323 : 121324, 121343, 123424  
121324 : 121345, 123425  
121331 : 121334, 121341, 123441, 123443  
121332 : 121334, 121342, 123442  
121333 : 121334, 121343, 121344, 123444  
121334 : 121345, 123445  
121341 : 121345, 123451, 123453  
121342 : 121345, 123452  
121343 : 121345, 123454  
121344 : 121345, 123455  
121345 : 123456  
122111 : 122113, 122131, 122133, 122311, 122313, 122331, 122333, 123111  
122112 : 122113, 122132, 122312, 122332, 123112, 123113  
122113 : 122134, 122314, 122334, 123114  
122121 : 122123, 122131, 122321, 122323, 123121, 123131  
122122 : 122123, 122132, 122133, 122322, 123122, 123123, 123132, 123133  
122123 : 122134, 122324, 123124, 123134

122131 : 122134, 122341, 122343, 123141  
122132 : 122134, 122342, 123142, 123143  
122133 : 122134, 122344, 123144  
122134 : 122345, 123145  
122211 : 122213, 122231, 122233, 122311, 123211, 123311  
122212 : 122213, 122232, 122312, 122313, 123212, 123213, 123312, 123313  
122213 : 122234, 122314, 123214, 123314  
122221 : 122223, 122231, 122321, 122331, 123221, 123231, 123321, 123331  
122222 : 122223, 122232, 122233, 122322, 122323, 122332, 122333, 123222, 123223,  
123232, 123233, 123322, 123323, 123332, 123333  
122223 : 122234, 122324, 122334, 123224, 123234, 123324, 123334  
122231 : 122234, 122341, 123241, 123341  
122232 : 122234, 122342, 122343, 123242, 123243, 123342, 123343  
122233 : 122234, 122344, 123244, 123344  
122234 : 122345, 123245, 123345  
122311 : 122314, 122341, 122344, 123411  
122312 : 122314, 122342, 123412, 123413  
122313 : 122314, 122343, 123414  
122314 : 122345, 123415  
122321 : 122324, 122341, 123421, 123431  
122322 : 122324, 122342, 122344, 123422, 123423, 123432, 123433  
122323 : 122324, 122343, 123424, 123434  
122324 : 122345, 123425, 123435  
122331 : 122334, 122341, 123441  
122332 : 122334, 122342, 123442, 123443  
122333 : 122334, 122343, 122344, 123444  
122334 : 122345, 123445  
122341 : 122345, 123451  
122342 : 122345, 123452, 123453  
122343 : 122345, 123454  
122344 : 122345, 123455  
122345 : 123456  
123111 : 123114, 123141, 123144, 123411, 123414, 123441, 123444  
123112 : 123114, 123142, 123412, 123442  
123113 : 123114, 123143, 123413, 123443  
123114 : 123145, 123415, 123445  
123121 : 123124, 123141, 123421, 123424  
123122 : 123124, 123142, 123144, 123422  
123123 : 123124, 123143, 123423  
123124 : 123145, 123425  
123131 : 123134, 123141, 123431, 123434  
123132 : 123134, 123142, 123432  
123133 : 123134, 123143, 123144, 123433  
123134 : 123145, 123435  
123141 : 123145, 123451, 123454  
123142 : 123145, 123452

123143 : 123145, 123453  
123144 : 123145, 123455  
123145 : 123456  
123211 : 123214, 123241, 123244, 123411  
123212 : 123214, 123242, 123412, 123414  
123213 : 123214, 123243, 123413  
123214 : 123245, 123415  
123221 : 123224, 123241, 123421, 123441  
123222 : 123224, 123242, 123244, 123422, 123424, 123442, 123444  
123223 : 123224, 123243, 123423, 123443  
123224 : 123245, 123425, 123445  
123231 : 123234, 123241, 123431  
123232 : 123234, 123242, 123432, 123434  
123233 : 123234, 123243, 123244, 123433  
123234 : 123245, 123435  
123241 : 123245, 123451  
123242 : 123245, 123452, 123454  
123243 : 123245, 123453  
123244 : 123245, 123455  
123245 : 123456  
123311 : 123314, 123341, 123344, 123411  
123312 : 123314, 123342, 123412  
123313 : 123314, 123343, 123413, 123414  
123314 : 123345, 123415  
123321 : 123324, 123341, 123421  
123322 : 123324, 123342, 123344, 123422  
123323 : 123324, 123343, 123423, 123424  
123324 : 123345, 123425  
123331 : 123334, 123341, 123431, 123441  
123332 : 123334, 123342, 123432, 123442  
123333 : 123334, 123343, 123344, 123433, 123434, 123443, 123444  
123334 : 123345, 123435, 123445  
123341 : 123345, 123451  
123342 : 123345, 123452  
123343 : 123345, 123453, 123454  
123344 : 123345, 123455  
123345 : 123456  
123411 : 123415, 123451, 123455  
123412 : 123415, 123452  
123413 : 123415, 123453  
123414 : 123415, 123454  
123415 : 123456  
123421 : 123425, 123451  
123422 : 123425, 123452, 123455  
123423 : 123425, 123453  
123424 : 123425, 123454

123425 : 123456  
123431 : 123435, 123451  
123432 : 123435, 123452  
123433 : 123435, 123453, 123455  
123434 : 123435, 123454  
123435 : 123456  
123441 : 123445, 123451  
123442 : 123445, 123452  
123443 : 123445, 123453  
123444 : 123445, 123454, 123455  
123445 : 123456  
123451 : 123456  
123452 : 123456  
123453 : 123456  
123454 : 123456  
123455 : 123456  
123456 :

### List of parameters reported by the model

- BMT\_ModelIndicator is the index of the substitution model as listed in the Appendix.
- substmodel is the model represented as a 6-digit number, where the position of the digit refers to rates ac, ag, at, cg, ct and gt respectively, and equal digits indicates that rates are shared, so 111111 is Jukes Cantor (if frequencies are kept equal), 121121 is HKY, 123456 is GTR etc.
- rateAC, . . . , rateGT are the rates according to the model. ESSs should be good for these rates, but if you plot joint-marginals of pairs you may find high correlation between some of these rates.
- BMT\_Rates.1 to 6 are the rates used to build up the rate matrix. If only low parameter models are samples, the higher rates will be sampled very infrequently, and you should expect low ESSs for them. Correlation between pairs of rates should be low.
- BM\_gammaShape is the gamma shape parameter as it is being sampled. For parts of the chain that gamma rate heterogeneity is switched off, the parameter will not be sampled, and the trace will show periods where the parameter is stuck.
- hasGammaRates indicates whether gamma rate heterogeneity it used (1) or not used (0). The mean can be interpreted as the proportion of time that gamma rate heterogeneity is switched on.
- ActiveGammaShape is the gamma shape parameter when it is sampled, but it is zero when it is not sampled. To get the estimate of the mean of the shape parameter, divide the mean ActiveGammaShape by the mean of hasGammaRates.
- BMT\_ProportionInvariable, hasInvariableSites and ActivePropInvariable are the value for proportion invariable similar to BMG\_gammaShape, hasGammaRates and ActiveGammaShape respectively.

- hasEqualFreqs indicates whether equal frequencies are used and the mean can be interpreted as the proportion of time that equal frequencies is used. When empirical frequencies are used, this parameter is not reported.

### 95% HPD of models for Primates data

| empirical freqs   |                    |        | estimated freqs   |                    |        |
|-------------------|--------------------|--------|-------------------|--------------------|--------|
| posterior support | cumulative support | model  | posterior support | cumulative support | model  |
| 21.12 %           | 21.12 %            | 121323 | 16.19%            | 16.19%             | 121121 |
| 17.48 %           | 38.60 %            | 123424 | 14.09%            | 30.27%             | 121123 |
| 13.71 %           | 52.31 %            | 123324 | 10.25%            | 40.53%             | 121323 |
| 10.13 %           | 62.44 %            | 123323 | 9.71%             | 50.24%             | 121131 |
| 7.82 %            | 70.26 %            | 121324 | 5.31%             | 55.55%             | 121134 |
| 7.74 %            | 78.00 %            | 121123 | 4.63%             | 60.18%             | 123323 |
| 5.48 %            | 83.48 %            | 123425 | 4.28%             | 64.46%             | 121321 |
| 2.87 %            | 86.35 %            | 123423 | 3.94%             | 68.40%             | 121324 |
| 2.69 %            | 89.03 %            | 121343 | 2.98%             | 71.38%             | 121343 |
| 2.24 %            | 91.28 %            | 123454 | 2.79%             | 74.17%             | 123324 |
| 1.50 %            | 92.78 %            | 123345 | 2.43%             | 76.60%             | 121341 |
| 1.38 %            | 94.16 %            | 123343 | 2.37%             | 78.97%             | 123123 |
| 1.27 %            | 95.42 %            | 123124 | 2.24%             | 81.21%             | 123343 |
|                   |                    |        | 2.09%             | 83.30%             | 123424 |
|                   |                    |        | 1.96%             | 85.26%             | 123321 |
|                   |                    |        | 1.96%             | 87.21%             | 123124 |
|                   |                    |        | 1.94%             | 89.16%             | 123121 |
|                   |                    |        | 1.52%             | 90.68%             | 123143 |
|                   |                    |        | 1.36%             | 92.03%             | 123341 |
|                   |                    |        | 1.32%             | 93.36%             | 123423 |
|                   |                    |        | 1.17%             | 94.52%             | 123141 |
|                   |                    |        | 1.14%             | 95.67%             | 121345 |



| Freqs   | Site Model | rate coverage |      |      |      |      |      | mean rate | Subst. Model coverage |
|---------|------------|---------------|------|------|------|------|------|-----------|-----------------------|
|         |            | AC            | AG   | AT   | CG   | CT   | GT   |           |                       |
| equal   | plain      | 94            | 94   | 98   | 93   | 97   | 96   | 95.3      | 97                    |
| equal   | +G         | 96            | 94   | 91   | 97   | 96   | 98   | 95.3      | 95                    |
| equal   | +I         | 95            | 95   | 94   | 92   | 94   | 93   | 93.8      | 96                    |
| equal   | +G+I       | 95            | 95   | 96   | 95   | 94   | 97   | 95.3      | 95                    |
| unequal | plain      | 96            | 95   | 93   | 95   | 99   | 97   | 95.8      | 95                    |
| unequal | +G         | 93            | 97   | 90   | 92   | 95   | 96   | 93.8      | 97                    |
| unequal | +I         | 94            | 97   | 96   | 96   | 97   | 96   | 96.0      | 95                    |
| unequal | +G+I       | 93            | 92   | 97   | 91   | 93   | 96   | 93.7      | 96                    |
| Mean    |            | 94.5          | 94.9 | 94.4 | 93.9 | 95.6 | 96.1 | 94.9      | 95.8                  |

  

| Freqs   | Site Model | Site Model coverage | $\alpha$ | $p_{inv}$ | frequency coverage | frequency coverage |      |      |      |
|---------|------------|---------------------|----------|-----------|--------------------|--------------------|------|------|------|
|         |            |                     |          |           |                    | A                  | C    | G    | T    |
| equal   | plain      | 100                 |          |           | 100                | 100                | 100  | 100  | 100  |
| equal   | +G         | 98                  | 90       |           | 100                | 100                | 100  | 100  | 100  |
| equal   | +I         | 94                  |          | 92        | 100                | 100                | 100  | 100  | 100  |
| equal   | +G+I       | 98                  | 92       | 90        | 100                | 100                | 100  | 100  | 100  |
| unequal | plain      | 100                 |          |           | 100                | 94                 | 95   | 92   | 96   |
| unequal | +G         | 95                  | 94       |           | 100                | 95                 | 95   | 93   | 94   |
| unequal | +I         | 94                  |          | 89        | 100                | 96                 | 90   | 92   | 94   |
| unequal | +G+I       | 97                  | 95       | 95        | 100                | 96                 | 95   | 97   | 96   |
| Mean    |            | 97.0                | 92.8     | 91.5      | 100.0              | 97.6               | 96.9 | 96.8 | 97.5 |

Table S1: Results as in Table 1, but for 5 taxa, relaxed clock, sequence length of 10K

| Freqs   | Site Model | rate coverage |      |      |      |      |      | mean rate | Subst. Model coverage |
|---------|------------|---------------|------|------|------|------|------|-----------|-----------------------|
|         |            | AC            | AG   | AT   | CG   | CT   | GT   |           |                       |
| equal   | plain      | 9             | 54   | 10   | 8    | 56   | 11   | 24.7      | 4                     |
| equal   | +G         | 9             | 54   | 11   | 11   | 55   | 11   | 25.2      | 4                     |
| equal   | +I         | 11            | 50   | 13   | 10   | 50   | 14   | 24.7      | 4                     |
| equal   | +G+I       | 10            | 54   | 13   | 10   | 55   | 14   | 26.0      | 4                     |
| unequal | plain      | 7             | 32   | 10   | 9    | 30   | 9    | 16.2      | 4                     |
| unequal | +G         | 11            | 35   | 16   | 11   | 33   | 13   | 19.8      | 4                     |
| unequal | +I         | 12            | 37   | 14   | 12   | 35   | 15   | 20.8      | 4                     |
| unequal | +G+I       | 13            | 36   | 15   | 12   | 36   | 13   | 20.8      | 4                     |
| Mean    |            | 10.2          | 44.0 | 12.8 | 10.4 | 43.8 | 12.5 | 22.3      | 4.0                   |

  

| Freqs   | Site Model | Site Model coverage | $\alpha$ | $p_{inv}$ | frequency coverage | frequency coverage |      |      |      |
|---------|------------|---------------------|----------|-----------|--------------------|--------------------|------|------|------|
|         |            |                     |          |           |                    | A                  | C    | G    | T    |
| equal   | plain      | 88                  |          |           | 34                 | 49                 | 46   | 44   | 51   |
| equal   | +G         | 94                  | 79       |           | 43                 | 53                 | 55   | 54   | 59   |
| equal   | +I         | 93                  |          | 71        | 35                 | 49                 | 53   | 51   | 51   |
| equal   | +G+I       | 96                  | 89       | 87        | 42                 | 55                 | 57   | 56   | 59   |
| unequal | plain      | 84                  |          |           | 100                | 31                 | 36   | 33   | 44   |
| unequal | +G         | 92                  | 83       |           | 100                | 43                 | 46   | 33   | 46   |
| unequal | +I         | 91                  |          | 69        | 100                | 37                 | 40   | 38   | 46   |
| unequal | +G+I       | 95                  | 86       | 89        | 100                | 43                 | 44   | 40   | 46   |
| Mean    |            | 91.6                | 84.2     | 79.0      | 69.2               | 45.0               | 47.1 | 43.6 | 50.2 |

Table S2: Results as in Table 1, but for 5 taxa, relaxed clock, sequence length of 10K, substitution model fixed to HKY

| Freqs   | Site Model | rate coverage |      |      |      |      |      | mean rate | Subst. Model coverage |
|---------|------------|---------------|------|------|------|------|------|-----------|-----------------------|
|         |            | AC            | AG   | AT   | CG   | CT   | GT   |           |                       |
| equal   | plain      | 96            | 96   | 95   | 91   | 96   | 92   | 94.3      | 2                     |
| equal   | +G         | 97            | 96   | 91   | 95   | 96   | 97   | 95.3      | 2                     |
| equal   | +I         | 96            | 98   | 94   | 97   | 95   | 96   | 96.0      | 2                     |
| equal   | +G+I       | 92            | 91   | 96   | 97   | 93   | 94   | 93.8      | 2                     |
| unequal | plain      | 97            | 92   | 96   | 91   | 97   | 98   | 95.2      | 2                     |
| unequal | +G         | 95            | 97   | 92   | 90   | 94   | 93   | 93.5      | 2                     |
| unequal | +I         | 95            | 96   | 97   | 94   | 93   | 95   | 95.0      | 2                     |
| unequal | +G+I       | 92            | 94   | 95   | 92   | 96   | 95   | 94.0      | 2                     |
| Mean    |            | 95.0          | 95.0 | 94.5 | 93.4 | 95.0 | 95.0 | 94.6      | 2.0                   |

  

| Freqs   | Site Model | Site Model coverage | $\alpha$ | $p_{inv}$ | frequency coverage | frequency coverage |      |      |      |
|---------|------------|---------------------|----------|-----------|--------------------|--------------------|------|------|------|
|         |            |                     |          |           |                    | A                  | C    | G    | T    |
| equal   | plain      | 100                 |          |           | 99                 | 100                | 100  | 100  | 100  |
| equal   | +G         | 92                  | 88       |           | 100                | 100                | 100  | 100  | 100  |
| equal   | +I         | 96                  |          | 97        | 100                | 100                | 100  | 100  | 100  |
| equal   | +G+I       | 98                  | 92       | 89        | 98                 | 100                | 100  | 100  | 100  |
| unequal | plain      | 100                 |          |           | 100                | 95                 | 96   | 95   | 95   |
| unequal | +G         | 95                  | 95       |           | 100                | 95                 | 97   | 93   | 92   |
| unequal | +I         | 94                  |          | 90        | 100                | 95                 | 89   | 96   | 92   |
| unequal | +G+I       | 97                  | 89       | 90        | 100                | 93                 | 94   | 97   | 96   |
| Mean    |            | 96.5                | 91.0     | 91.5      | 99.6               | 97.2               | 97.0 | 97.6 | 96.9 |

Table S3: Results as in Table 1, but for 5 taxa, relaxed clock, sequence length of 10K, substitution model fixed to GTR

| Freqs   | Site Model | rate coverage |      |      |      |      |      | mean rate | Subst. Model coverage |
|---------|------------|---------------|------|------|------|------|------|-----------|-----------------------|
|         |            | AC            | AG   | AT   | CG   | CT   | GT   |           |                       |
| equal   | plain      | 95            | 97   | 95   | 92   | 95   | 93   | 94.5      | 97                    |
| equal   | +G         | 92            | 94   | 94   | 96   | 92   | 94   | 93.7      | 96                    |
| equal   | +I         | 92            | 94   | 89   | 91   | 93   | 94   | 92.2      | 99                    |
| equal   | +G+I       | 94            | 98   | 91   | 96   | 93   | 92   | 94.0      | 96                    |
| unequal | plain      | 94            | 94   | 94   | 93   | 92   | 95   | 93.7      | 96                    |
| unequal | +G         | 95            | 96   | 92   | 94   | 98   | 93   | 94.7      | 98                    |
| unequal | +I         | 93            | 94   | 93   | 94   | 94   | 92   | 93.3      | 96                    |
| unequal | +G+I       | 96            | 94   | 94   | 96   | 94   | 92   | 94.3      | 98                    |
| Mean    |            | 93.9          | 95.1 | 92.8 | 94.0 | 93.9 | 93.1 | 93.8      | 97.0                  |

  

| Freqs   | Site Model | Site Model coverage | $\alpha$ | $p_{inv}$ | frequency coverage | frequency coverage |      |      |      |
|---------|------------|---------------------|----------|-----------|--------------------|--------------------|------|------|------|
|         |            |                     |          |           |                    | A                  | C    | G    | T    |
| equal   | plain      | 100                 |          |           | 100                | 100                | 100  | 100  | 100  |
| equal   | +G         | 95                  | 93       |           | 100                | 100                | 100  | 100  | 100  |
| equal   | +I         | 98                  |          | 94        | 100                | 100                | 100  | 100  | 100  |
| equal   | +G+I       | 94                  | 88       | 88        | 99                 | 100                | 100  | 100  | 100  |
| unequal | plain      | 99                  |          |           | 100                | 92                 | 94   | 95   | 96   |
| unequal | +G         | 88                  | 87       |           | 100                | 92                 | 90   | 95   | 94   |
| unequal | +I         | 98                  |          | 94        | 100                | 95                 | 95   | 99   | 96   |
| unequal | +G+I       | 94                  | 86       | 87        | 100                | 96                 | 95   | 88   | 92   |
| Mean    |            | 95.8                | 88.5     | 90.8      | 99.9               | 96.9               | 96.8 | 97.1 | 97.2 |

Table S4: Results as in Table 1, but for 16 taxa, relaxed clock, sequence length of 5K

| Freqs   | Site Model | rate coverage |      |      |      |      |      | mean rate | Subst. Model coverage |
|---------|------------|---------------|------|------|------|------|------|-----------|-----------------------|
|         |            | AC            | AG   | AT   | CG   | CT   | GT   |           |                       |
| equal   | plain      | 96            | 95   | 93   | 94   | 95   | 91   | 94.0      | 96                    |
| equal   | +G         | 91            | 94   | 92   | 95   | 93   | 93   | 93.0      | 96                    |
| equal   | +I         | 98            | 91   | 94   | 95   | 96   | 96   | 95.0      | 93                    |
| equal   | +G+I       | 97            | 99   | 96   | 97   | 96   | 98   | 97.2      | 97                    |
| unequal | plain      | 95            | 97   | 96   | 95   | 93   | 92   | 94.7      | 96                    |
| unequal | +G         | 95            | 95   | 97   | 95   | 94   | 95   | 95.2      | 96                    |
| unequal | +I         | 93            | 94   | 94   | 100  | 95   | 92   | 94.7      | 98                    |
| unequal | +G+I       | 94            | 93   | 97   | 98   | 93   | 96   | 95.2      | 97                    |
| Mean    |            | 94.9          | 94.8 | 94.9 | 96.1 | 94.4 | 94.1 | 94.9      | 96.1                  |

  

| Freqs   | Site Model | Site Model coverage | $\alpha$ | $p_{inv}$ | frequency coverage | frequency coverage |      |      |      |
|---------|------------|---------------------|----------|-----------|--------------------|--------------------|------|------|------|
|         |            |                     |          |           |                    | A                  | C    | G    | T    |
| equal   | plain      | 100                 |          |           | 97                 | 100                | 100  | 100  | 100  |
| equal   | +G         | 92                  | 86       |           | 96                 | 100                | 100  | 100  | 100  |
| equal   | +I         | 95                  |          | 93        | 94                 | 100                | 99   | 99   | 100  |
| equal   | +G+I       | 94                  | 93       | 88        | 94                 | 100                | 100  | 100  | 100  |
| unequal | plain      | 100                 |          |           | 99                 | 96                 | 93   | 90   | 92   |
| unequal | +G         | 92                  | 89       |           | 98                 | 93                 | 96   | 97   | 97   |
| unequal | +I         | 99                  |          | 91        | 100                | 97                 | 93   | 93   | 94   |
| unequal | +G+I       | 95                  | 87       | 84        | 100                | 94                 | 95   | 95   | 95   |
| Mean    |            | 95.9                | 88.8     | 89.0      | 97.2               | 97.5               | 97.0 | 96.8 | 97.2 |

Table S5: Results as in Table 1, but for 16 taxa, relaxed clock, sequence length of 1K

| Freqs   | Site Model | rate coverage |      |      |      |      |      | mean rate | Subst. Model coverage |
|---------|------------|---------------|------|------|------|------|------|-----------|-----------------------|
|         |            | AC            | AG   | AT   | CG   | CT   | GT   |           |                       |
| equal   | plain      | 93            | 96   | 94   | 93   | 97   | 98   | 95.2      | 94                    |
| equal   | +G         | 92            | 94   | 98   | 96   | 95   | 97   | 95.3      | 94                    |
| equal   | +I         | 97            | 94   | 94   | 93   | 95   | 91   | 94.0      | 96                    |
| equal   | +G+I       | 99            | 95   | 96   | 97   | 93   | 99   | 96.5      | 95                    |
| unequal | plain      | 90            | 97   | 90   | 98   | 93   | 97   | 94.2      | 96                    |
| unequal | +G         | 95            | 95   | 98   | 96   | 94   | 96   | 95.7      | 97                    |
| unequal | +I         | 96            | 95   | 96   | 95   | 97   | 93   | 95.3      | 98                    |
| unequal | +G+I       | 95            | 93   | 94   | 93   | 93   | 95   | 93.8      | 98                    |
| Mean    |            | 94.6          | 94.9 | 95.0 | 95.1 | 94.6 | 95.8 | 95.0      | 96.0                  |

  

| Freqs   | Site Model | Site Model coverage | $\alpha$ | $p_{inv}$ | frequency coverage | frequency coverage |      |      |      |
|---------|------------|---------------------|----------|-----------|--------------------|--------------------|------|------|------|
|         |            |                     |          |           |                    | A                  | C    | G    | T    |
| equal   | plain      | 100                 |          |           | 89                 | 99                 | 100  | 100  | 99   |
| equal   | +G         | 93                  | 88       |           | 85                 | 100                | 100  | 100  | 100  |
| equal   | +I         | 98                  |          | 96        | 85                 | 93                 | 100  | 100  | 100  |
| equal   | +G+I       | 93                  | 87       | 85        | 81                 | 94                 | 99   | 100  | 100  |
| unequal | plain      | 98                  |          |           | 99                 | 95                 | 92   | 90   | 87   |
| unequal | +G         | 93                  | 94       |           | 98                 | 92                 | 97   | 98   | 94   |
| unequal | +I         | 99                  |          | 90        | 99                 | 91                 | 93   | 95   | 93   |
| unequal | +G+I       | 94                  | 87       | 85        | 98                 | 95                 | 94   | 95   | 94   |
| Mean    |            | 96.0                | 89.0     | 89.0      | 91.8               | 94.9               | 96.9 | 97.2 | 95.9 |

Table S6: Results as in Table 1, but for 16 taxa, relaxed clock, sequence length of 0.5K

| 5 taxa 10K sequences |                       |      |                       |            |          |
|----------------------|-----------------------|------|-----------------------|------------|----------|
|                      | jModelTest            |      |                       | bModelTest |          |
|                      | AIC                   | AIC  | BIC                   | BIC        |          |
|                      | 95% coverage best fit |      | 95% coverage best fit |            | coverage |
| Equal Freq           | 92                    | 53   | 90                    | 82         | 97       |
| Equal Freq + G       | 85                    | 47   | 84                    | 72         | 96       |
| Equal Freq + G + I   | 93                    | 46   | 86                    | 70         | 97       |
| Equal Freq + I       | 93                    | 44   | 87                    | 78         | 96       |
| Unequal Freq         | 93                    | 42   | 89                    | 75         | 97       |
| Unequal Freq + G     | 84                    | 47   | 79                    | 69         | 95       |
| Unequal Freq + G + I | 87                    | 45   | 77                    | 68         | 93       |
| Unequal Freq + I     | 88                    | 52   | 81                    | 77         | 97       |
| mean:                | 89.4                  | 47.0 | 84.1                  | 73.9       | 96       |

  

| 16 taxa 1K sequences |                       |      |                       |            |          |
|----------------------|-----------------------|------|-----------------------|------------|----------|
|                      | jModelTest            |      |                       | bModelTest |          |
|                      | AIC                   | AIC  | BIC                   | BIC        |          |
|                      | 95% coverage best fit |      | 95% coverage best fit |            | coverage |
| Equal Freq           | 73                    | 34   | 71                    | 48         | 96       |
| Equal Freq + G       | 76                    | 34   | 74                    | 40         | 96       |
| Equal Freq + G + I   | 73                    | 32   | 68                    | 42         | 97       |
| Equal Freq + I       | 72                    | 38   | 74                    | 48         | 93       |
| Unequal Freq         | 73                    | 43   | 73                    | 45         | 96       |
| Unequal Freq + G     | 69                    | 37   | 65                    | 38         | 96       |
| Unequal Freq + G + I | 62                    | 30   | 59                    | 35         | 97       |
| Unequal Freq + I     | 70                    | 37   | 72                    | 39         | 98       |
| mean:                | 71.0                  | 35.6 | 69.5                  | 41.9       | 96.1     |

  

| 16 taxa 0.5K sequences |                       |      |                       |            |          |
|------------------------|-----------------------|------|-----------------------|------------|----------|
|                        | jModelTest            |      |                       | bModelTest |          |
|                        | AIC                   | AIC  | BIC                   | BIC        |          |
|                        | 95% coverage best fit |      | 95% coverage best fit |            | coverage |
| Equal Freq             | 66                    | 31   | 66                    | 32         | 94       |
| Equal Freq + G         | 73                    | 41   | 69                    | 38         | 94       |
| Equal Freq + G + I     | 64                    | 32   | 56                    | 31         | 95       |
| Equal Freq + I         | 64                    | 31   | 63                    | 38         | 96       |
| Unequal Freq           | 72                    | 37   | 67                    | 34         | 96       |
| Unequal Freq + G       | 58                    | 28   | 56                    | 29         | 97       |
| Unequal Freq + G + I   | 58                    | 21   | 55                    | 21         | 98       |
| Unequal Freq + I       | 59                    | 25   | 57                    | 27         | 98       |
| mean:                  | 64.3                  | 30.8 | 61.1                  | 31.3       | 96       |

Table S7: Model coverage by jModelTest and bModelTest. **jModelTest 95% coverage** columns show the number of times the true substitution model was included in the smallest set of substitution models covering 95% of the weight according to the AIC and BIC criterion in jModelTest. **jModelTest best fit** columns show the number of times the best scoring model according to the BIC criterion is the true model. **bModelTest coverage** columns show the number of times the 95% credible set of substitution models contains the true model.
